# Supplementary material for: In vivo inducible reverse genetics in patients’ tumors to identify individual therapeutic targets
Source: Nat Commun. 2021 Sep 27;12:5655. doi: 10.1038/s41467-021-25963-z (PMC8476619; doi:10.1038/s41467-021-25963-z)
Supplement: Supplementary file 4 — Source Data [file 41467_2021_25963_MOESM4_ESM.xlsx]

## Sheet: Fig2b, S1d
	AML-388
		shMCL1				shCTRL
	days post-TAM
	3	53.8	56.1	60.1		68.3	67.6	67.5
	7	38.4	54.6	39
	26	15.6	17.8	17.5		78.1	65.3	72.4
	36	3.29	13.4	5.07	5.98

## Sheet: WES Fig2a
									MCL1 (D3CA5, Cell Signaling Technologies)
									β-actin (NB600-501SS, Novus Biologicals)

## Sheet: WES Fig3d
									DUX4 (MAB9535, R&D system)
									β-actin (NB600-501SS, Novus Biologicals)

## Sheet: WB Fig S2b
						ALL-265
						line7 = shCTRL
						line8 = shMCL1
							MCL1 (S-19) Antibody, ref#sc-819 (Santa Cruz Biotechnology)
							GAPDH (6C5) Mouse monoclonal Antibody, ref#CB1001-500UG (Merck Millipore)

## Sheet: Fig 2c, S1d
	ALL-199	shMCL1				shCTRL
	days post-TAM
	3	53.8	51.1	50		52	51	53
	32	45.4	40	44.3		48.1	42.6	42

## Sheet: Fig 2e
	AML-388
	days post-injection	Control				MCL1 Inhibitor
	11	21900000	96800000	70000000	59800000	53600000	49000000	59200000	99800000	74400000	69300000
	14	125000000	471000000	525000000	340000000	266000000	210000000	348000000	570000000	411000000	358000000
	18	1300000000	4460000000	4920000000	2990000000	298000000	210000000	360000000	863000000	505000000	801000000
	21	5060000000	15700000000	14400000000	14200000000	909000000	1100000000	1270000000	2930000000	2270000000	3240000000
	24	15800000000	27700000000	29000000000	19800000000	788000000	672000000	859000000	3330000000	1790000000	813000000
	28	47700000000	62800000000	81300000000	59900000000	2340000000	1760000000	3620000000	4020000000	2530000000	2290000000
	31	83200000000	112000000000	145000000000	126000000000	1870000000	2560000000	6090000000	12800000000	6810000000	2100000000
	ALL-199
	days post-injection	Control						MCL1 Inhibitor
	11	608000000	802000000	1090000000	719000000			473000000	558000000	515000000	432000000	526000000	687000000
	14	2330000000	2220000000	4420000000	2650000000			1960000000	2110000000	1260000000	1200000000	1050000000	2650000000
	18	7080000000	15000000000	19500000000	17600000000			16900000000	18600000000	13000000000	8900000000	8380000000	17400000000
	21	23700000000	35700000000	34800000000	31200000000			33500000000	44700000000	38400000000	28600000000	24900000000	38200000000
	24	17000000000	38000000000	37900000000	40200000000			31100000000	46400000000	28900000000	39200000000	28600000000	38300000000
	28	40500000000	82700000000	64800000000	70600000000			48100000000	68000000000	65300000000	40600000000	64000000000	86800000000
	31	62300000000	110000000000	112000000000	95100000000			67800000000	102000000000	83900000000	75500000000	98400000000	86400000000

## Sheet: Fig 2g
	AML-388
		shMCL1 - 10 days TAM						shMCL1 - 10 days TAM + Venetoclax
	days post-TAM
	3	43.2	56.6	46.2				43.2	56.6	46.2
	17	20.9	45.1	26.2				2.42	3.46	3.17

## Sheet: Fig 3a
	ALL-707
	shCTRL				shMLL-AF4								shCTRL				shMLL-AF4								shCTRL				shMLL-AF4
	1	1	1	1	0.76	0.55	0.7	0.38					1	1	1	1	1.04	0.76	1.21	1.02					1	1	1		1.39	0.84	1.12

## Sheet: Fig 3b
	ALL-707
		shMLL-AF4						shCTRL
	days post_TAM
	3	54.9	52.2	56.3	57.1			47.5	37	41.8	56
	13	41.3	37.3	37.8				42.9	47.7	46.6
	21	16.9	17	20.8				48.5	43.9	44.7
	28	13.4	14.8	8.63				59.5	40.9	44.6

## Sheet: Fig3d
	ALL-811
	days post-TAM			shDUX4
	3	29.1	30.7	29.2
	61	9.5	13.3	16.4	7.97	11	14.5

[truncated: 16 more sheets: Fig 3g, Fig 3h, Fig 3i, Fig S1d, Fig S1d, summary plot, Fig S1f, Fig S2a, Fig S2b, Fig S2c, Fig S2e, Fig S2f, Fig S2h, Fig S2i, Fig S2j, Fig S3a, Fig S3b]
